# Supplementary material for: Methylome and Transcriptome Analyses of Soybean Response to Bean Pyralid Larvae
Source: Research Square preprint supplement (doi:10.21203/rs.3.rs-695343/v1), 2021-07-27
Supplement: Supplementary file 1 [file 27c532d34d0cf5d54e7eb161.xlsx]

## Sheet: Sheet1
Table S4 MapMan cluster analysis of the negatively correlated genes
Gene ID	Gene Mescription	Mercator Annotation
	Protein biosynthesis and modification
LOC100784915	30S ribosomal protein 1, chloroplastic-like	Protein biosynthesis. organelle machinery. plastidial ribosome
LOC100794560	ribosome-recycling factor, chloroplastic-like	Protein biosynthesis. organelle machinery. translation termination
LOC102669841	midasin	Protein biosynthesis. ribosome biogenesis. large ribosomal subunit (LSU)
LOC100792174	60S ribosomal protein L3	Protein biosynthesis. ribosome biogenesis. large ribosomal subunit (LSU)
LOC100803721	guanine nucleotide exchange factor SPIKE 1	Protein biosynthesis. ribosome biogenesis. rRNA biosynthesis
LOC102664796	nucleolin 1	Protein biosynthesis. ribosome biogenesis. rRNA biosynthesis
LOC100793149	rRNA biogenesis protein RRP5	Protein biosynthesis. ribosome biogenesis. small ribosomal subunit (SSU)
LOC100818051	uncharacterized LOC100818051	Protein biosynthesis. translation elongation. eEF2 mRNA-translocation factor activity
LOC102669842	translation initiation factor eIF-2B subunit alpha	Protein biosynthesis. translation initiation. Pre-Initiation Complex (PIC) module
LOC100811995	chaperonin CPN60-2, mitochondria	Protein biosynthesis. protein quality control. Hsp60 chaperone system
LOC102659388	leucine aminopeptidase 2, chloroplastic	Protein biosynthesis. proteolysis. metallopeptidase activities
LOC100785379	ATP-dependent Clp protease adapter protein CLPS1, chloroplastic	Protein biosynthesis. proteolysis. serine-type peptidase activities
LOC100802277	LON peptidase N-terminal domain and RING finger protein 1	Protein biosynthesis. proteolysis. serine-type peptidase activities
LOC100796456	subtilisin-like protease SBT2.2 (SBT2)	Protein biosynthesis. proteolysis. serine-type peptidase activities
LOC100786866	F-box/LRR-repeat protein At5g63520	Protein biosynthesis. ubiquitin-proteasome system. ubiquitin-fold protein conjugation
LOC100500241	small ubiquitin-like modifier (SUMO)	Protein biosynthesis. ubiquitin-proteasome system. ubiquitin-fold protein conjugation
LOC100790800	E3 ubiquitin-protein ligase RGLG2	Protein biosynthesis. ubiquitin-proteasome system. ubiquitin-fold protein conjugation
LOC100782610	uncharacterized LOC100782610	Protein biosynthesis. ubiquitin-proteasome system. ubiquitin-fold protein conjugation.
LOC100798088	serine/threonine-protein kinase D6PKL2	Protein modification. phosphorylation. AGC protein kinase superfamily.
LOC100805392	probable serine/threonine-protein kinase WNK2	Protein modification. phosphorylation. STE protein kinase superfamily(MAP3K-WNK)
LOC100775637	protein kinase superfamily protein	Protein modification. phosphorylation. STE protein kinase superfamily(MAP4K)
LOC100778369	mitogen-activated protein kinase 9	Protein modification. phosphorylation. STE protein kinase superfamily(MAPKK)
LOC100794112	G-type lectin S-receptor-like serine/threonine-protein kinase At4g27290	Protein modification. phosphorylation. TKL protein kinase superfamily
LOC100305354	serine/threonine kinase-like protein	Protein modification. phosphorylation. TKL protein kinase superfamily
LOC100808098	protein MALE DISCOVERER 2	Protein modification. phosphorylation. TKL protein kinase superfamily
LOC100784920	probable LRR receptor-like serine/threonine-protein kinase At1g53430	Protein modification. phosphorylation. TKL protein kinase superfamily
LOC100792665	cysteine-rich receptor-like protein kinase, CRK40	Protein modification. phosphorylation. TKL protein kinase superfamily
LOC100775428	cysteine-rich receptor-like protein kinase,CRK62	Protein modification. phosphorylation. TKL protein kinase superfamily
LOC100810362	L-type lectin-domain containing receptor kinase VIII.2	Protein modification. phosphorylation. TKL protein kinase superfamily
LOC100819005	ATP-dependent zinc metalloprotease FTSH 12, chloroplastic	Protein translocation. chloroplast. inner envelope TIC translocation system
LOC100815190	ALBINO3-like protein 1, chloroplastic	Protein translocation. chloroplast. thylakoid membrane SRP insertion system
	Secondary metabolism
LOC100815441	naringenin, 2-oxoglutarate 3-dioxygenase	Phenolics. flavonoid biosynthesis. dihydroflavonols
LOC100811727	cytochrome P450 81E8	Phenolics. flavonoid biosynthesis. isoflavonoids
LOC100788180	lycopene epsilon cyclase, chloroplastic (LCY-e)	Terpenoids. carotenoid biosynthesis. carotenes
	Phytohormone action
LOC100804439	protein PIN-LIKES 3	Auxin. transport. auxin efflux transporter (PILS)
LOC100786461	receptor-like protein kinase FERONIA-like	Signalling peptides. CRP (cysteine-rich-peptide) category. RALF/RALFL-peptide activity
	External stimuli response
LOC100808231	WRKY33-activating protein (SIB)	Pathogen. defense mechanisms. WRKY33-dependent plant immunity
LOC100820033	LRR domain-containing protein	Pathogen. effector-triggered immunity (ETI) network. effector receptor (NLR)
LOC547638	resistance protein KR3 isoform X1	Pathogen. effector-triggered immunity (ETI) network. effector receptor (NLR)
	Cell cycle, Cell structure and component
LOC100819817	transcription factor E2FB	Cell cycle organization. cell cycle control. Regulation.
LOC100775793	CLIP-associated protein (CLASP)	Cell cycle organization. cytokinesis. preprophase microtubule organization
LOC100784221	kinesin-like protein KIN-14N	Cell cycle organization. cytokinesis. preprophase microtubule organization
LOC100818329	replication factor C subunit 3-like (RFC3)	Cell cycle organization. DNA replication. elongation
LOC100790649	telomerase reverse transcriptase	Cell cycle organization. DNA replication. telomere replication
LOC100818209	membrane-associated protein VIPP1-like	Cell cycle organization. membrane organisation. plastid membrane remodeling
LOC100778712	structural maintenance of chromosomes protein 4	Cell cycle organization. mitosis and meiosis. chromatin condensation
LOC100796280	fanconi-associated nuclease 1 homolog	Cell cycle organization. mitosis and meiosis. meiotic recombination
LOC100526925	anaphase-promoting complex subunit 10-like (APC10)	Cell cycle organization. mitosis and meiosis. metaphase to anaphase transition
LOC100775410	anaphase-promoting complex subunit 5 (APC5)	Cell cycle organization. mitosis and meiosis. metaphase to anaphase transition
LOC100806552	ATP-dependent DNA helicase homolog RECG, chloroplastic	Cell cycle organization. organellar DNA replication. genome stability maintenance
LOC100784356	cell division protein FtsZ homolog 2-1, chloroplastic (component FtsZ2)	Cell cycle organization. organelle division. plastid division
LOC100779834	cellulose synthase A catalytic subunit 7 [UDP-forming] ( catalytic component CesA) (CesA7)	Cell wall organization. cellulose. cellulose synthase complex (CSC)
LOC100784207	cellulose synthase A catalytic subunit 8 [UDP-forming] (catalytic component CesA) (CesA8)	Cell wall organization. cellulose. cellulose synthase complex (CSC)
LOC100794002	protein CELLULOSE SYNTHASE INTERACTIVE 1 (CSI1)	Cell wall organization. cellulose. cellulose synthase complex (CSC)
LOC100807370	protein CELLULOSE SYNTHASE INTERACTIVE 1-like (CSI1-like)	Cell wall organization. cellulose. cellulose synthase complex (CSC)
LOC100796246	putative UDP-glucuronate: xylan alpha-glucuronosyltransferase 3 (GUX)	Cell wall organization. hemicellulose. Xylan biosynthesis. glucuronosyltransferase activities
LOC100818655	tricin synthase 1	Cell wall organization. lignin. monolignol biosynthesis
LOC100812418	probable methyltransferase PMT13	Cell wall organization. pectin. homogalacturonan
LOC100785688	beta-galactosidase 1 (BGAL)	Cell wall organization. pectin. rhamnogalacturonan I
LOC100794850	fimbrin-1	Cytoskeleton organization. microfilament network. actin polymerisation
LOC100803578	formin-like protein 6	Cytoskeleton organization. microfilament network. actin polymerisation
LOC100796816	kinesin-like protein KIN-14B	Cytoskeleton organization. microtubular network. Kinesin microtubule-based motor protein activities
LOC100786770	kinesin-like protein KIN-4A	Cytoskeleton organization. microtubular network. Kinesin microtubule-based motor protein activities
LOC100820627	protein SINE1	Cytoskeleton organization. nuclear dynamics. nuclear envelope to cytoskeleton bridging
LOC100803056	actin-related protein 7 (ARP7)	Chromatin organization. chromatin remodeling complexes. additional core components
	Cellular respiration
LOC100820456	mitochondrial uncoupling protein 1 (PUMP)	Oxidative phosphorylation. alternative NAD(P)H dehydrogenase activities
	Enzyme classification
LOC100791780	soyasapogenol B glucuronide galactosyltransferase-like protein	EC_2 transferases. EC_2.4 glycosyltransferase
LOC100818310	probable serine/threonine-protein kinase PIX13	EC_2 transferases. EC_2.7 transferase transferring phosphorus-containing group
LOC100796320	receptor-like protein kinase FERONIA	EC_2 transferases. EC_2.7 transferase transferring phosphorus-containing group
LOC100037472	protein disulfide isomerase-like protein, PDIS-2	EC_5 isomerases. EC_5.3 intramolecular oxidoreductase
LOC100820155	2,3-bisphosphoglycerate-independent phosphoglycerate mutase	EC_5 isomerases. EC_5.4 intramolecular transferase
	Primary metabolism
LOC100782096	NADP-dependent malic enzyme	Lipid metabolism. fatty acid biosynthesis. citrate shuttle
LOC100816616	UDP-sulfoquinovose synthase, chloroplastic	Lipid metabolism. fgalactolipid and sulfolipid biosynthesis
LOC100811955	aconitate hydratase 1	Lipid metabolism. flipid degradation. fatty acid degradation
LOC100794849	phospholipase D alpha 1 (PLD-alpha1)	Lipid metabolism. flipid degradation. phospholipase activities
LOC100814197	triacylglycerol lipase 2 (LIP)	Lipid metabolism. flipid degradation. triacylglycerol lipase activities
LOC100804638	protein TRIGALACTOSYLDIACYLGLYCEROL 4, chloroplastic (TGD4)	Lipid metabolism. flipid trafficking. endoplasmic freticulum-plastid lipid transfer l
LOC100786470	cystathionine beta-lyase, chloroplastic-like	Amino acid metabolism. biosynthesis. aspartate family
LOC100816378	serine O-acetyltransferase (SAT)	Amino acid metabolism. biosynthesis. serine family
LOC100818789	6-phosphogluconate dehydrogenase, decarboxylating 2, chloroplastic	Carbohydrate metabolism. oxidative pentose phosphate pathway
LOC100816365	beta-amylase 8	Carbohydrate metabolism. starch metabolism. degradation
LOC100790112	UTP-glucose-1-phosphate uridylyltransferase	Carbohydrate metabolism. sucrose metabolism. biosynthesis
LOC100782743	1,4-dihydroxy-2-naphthoyl-CoA synthase, peroxisomal	Coenzyme metabolism. phylloquinone biosynthesis
LOC100789973	2-phytyl-1,4-beta-naphthoquinone methyltransferase, chloroplastic	Coenzyme metabolism. phylloquinone biosynthesis
LOC100787735	magnesium-chelatase subunit ChlH, chloroplastic	Coenzyme metabolism. tetrapyrrol biosynthesis. chlorophyll metabolism
LOC100807032	uroporphyrinogen decarboxylase 1, chloroplastic	Coenzyme metabolism. tetrapyrrol biosynthesis. protoporphyrin IX formation
LOC100787350	phosphomethylpyrimidine synthase, chloroplastic	Coenzyme metabolism. thiamine pyrophosphate biosynthesis. hydroxymethylpyrimidine diphosphate biosynthesis
	Multi-process regulation
LOC100800977	protein LNK2	Circadian clock system. evening element regulation. transcriptional co-activator (LNK)
LOC102660101	phosphoinositide phosphatase SAC1-like	Phosphoinositide lipid regulatory system. inositol polyphosphate 5-phosphatase activities
	Nutrient uptake
LOC100809905	glutamate synthase [NADH], amyloplastic	Nitrogen assimilation. ammonium assimilation. glutamate synthase activities
	Photosynthesis
LOC100811347	uncharacterized LOC100811347	Photophosphorylation. photosystem II. assembly and maintenance
	Redox homeostasis
LOC100819254	NADPH-dependent thioredoxin reductase 3	Chloroplast redox homeostasis
LOC100799504	thylakoid lumenal 29 kDa protein, chloroplastic	Hydrogen peroxide removal. ascorbate-glutathione cycle. ascorbate peroxidase (APX)
	RNA biosynthesis and processing
LOC100800701	DNA-directed RNA polymerase 1B, mitochondrial	RNA biosynthesis. organelle machinery. RNA polymerase activities
LOC100777921	DNA-directed RNA polymerase 2B, chloroplastic/mitochondrial	RNA biosynthesis. organelle machinery. RNA polymerase activities
LOC100802776	DNA-directed RNA polymerase 3B, chloroplastic	RNA biosynthesis. organelle machinery. RNA polymerase activities.
LOC100802355	uncharacterized LOC100802355	RNA biosynthesis. organelle machinery. RNA polymerase activities
LOC100820426	uncharacterized LOC100820426	RNA biosynthesis. transcriptional regulation. AP2/ERF transcription factor superfamily
LOC100775750	GATA transcription factor 26	RNA biosynthesis. transcriptional regulation. C2C2 transcription factor superfamily
LOC100791958	putative Myb family transcription factor At1g14600	RNA biosynthesis. transcriptional regulation. MYB transcription factor superfamily. transcription factor (GARP)
LOC100809974	transcription factor BEE 1	RNA biosynthesis. transcriptional regulation
LOC100794354	transcription factor bHLH25	RNA biosynthesis. transcriptional regulation
LOC100777819	transcription factor bHLH79	RNA biosynthesis. transcriptional regulation
LOC100806962	transcription factor SPATULA	RNA biosynthesis. transcriptional regulation
LOC100819089	small nuclear ribonucleoprotein Sm D1-like	RNA processing. pre-mRNA splicing. U1/U2/U4/U5-associated Sm accessory ribonucleoprotein complex
LOC100809637	uncharacterized LOC100809637	RNA processing. tRNA modification. methylation
	Solute transport
LOC100778395	chloride channel protein CLC-b	Carrier-mediated transport. anion channel / anion. proton antiporter (CLC)
LOC100817699	amino acid permease 4	Carrier-mediated transport. APC superfamily. AAAP family
LOC100777626	amino acid permease 4	Carrier-mediated transport. APC superfamily. AAAP family
LOC100803263	ABC transporter A family member 1	Primary active transport. ABC superfamily. ABC2 family
LOC100786666	pleiotropic drug resistance protein 2	Primary active transport. ABC superfamily. ABC2 family
LOC100816905	plasma membrane ATPase 4	Primary active transport. P-type ATPase superfamily. P3 family
	Vesicle trafficking
LOC100777949	vacuolar-sorting receptor 1 (VSR)	Endomembrane trafficking. vacuolar sorting. vacuolar sorting receptor
LOC102669438	exocyst complex component EXO70B1	Target membrane tethering. Exocyst complex
