# Supplementary material for: Methylome and Transcriptome Analyses of Soybean Response to Bean Pyralid Larvae
Source: Research Square preprint supplement (doi:10.21203/rs.3.rs-695343/v1), 2021-07-27
Supplement: Supplementary file 2 [file 302efa2b2adb9c9a78f34520.xlsx]

## Sheet: Sheet1
Table S1 The negatively correlated genes between transcription and methylation of soybean resistance to bean pyralid larvae
Sample	Gene_ID	Gene description	E (up/down)	M (up/down)
HRK0/HRK48 and HSK0/HSK48	LOC100819005	ATP-dependent zinc metalloprotease FTSH 12, chloroplastic	up	down
HRK0/HRK48	LOC100799504	thylakoid lumenal 29 kDa protein, chloroplastic	up	down
	LOC100787735	magnesium-chelatase subunit ChlH, chloroplastic	up	down
	LOC100814882	uncharacterized hydrolase YugF	up	down
	LOC100793363	uncharacterized LOC100793363	up	down
	LOC100802277	LON peptidase N-terminal domain and RING finger protein 1	up	down
	LOC100784221	kinesin-like protein KIN-14N	up	down
	LOC100817872	probable inactive ATP-dependent zinc metalloprotease FTSHI 5, chloroplastic	up	down
	LOC100812461	uncharacterized LOC100812461	up	down
	LOC100775395	uncharacterized LOC100775395	up	down
	LOC100796816	kinesin-like protein KIN-14B	up	down
	LOC100806552	ATP-dependent DNA helicase homolog RECG, chloroplastic	up	down
	LOC100818670	diacylglycerol O-acyltransferase 2D-like	up	down
	LOC100802776	DNA-directed RNA polymerase 3B, chloroplastic	up	down
	LOC100812745	long-chain acyl-CoA synthetase ACSL2	up	down
	LOC100794850	fimbrin-1	up	down
	LOC100787964	pentatricopeptide repeat-containing protein At4g04790, mitochondrial	up	down
	LOC100818209	membrane-associated protein VIPP1-like	up	down
	LOC100800025	KHG/KDPG aldolase	up	down
	LOC100794354	transcription factor bHLH25	up	down
	LOC100784025	pentatricopeptide repeat-containing protein At5g39980, chloroplastic	up	down
	LOC100793149	rRNA biogenesis protein RRP5	up	down
	LOC100800701	DNA-directed RNA polymerase 1B, mitochondrial	up	down
	LOC102669841	midasin	up	down
	LOC100775793	CLIP-associated protein	up	down
	LOC102659776	uncharacterized LOC102659776	down	up
	LOC100785963	putative aminoacrylate hydrolase RutD	down	up
	LOC100800197	2-hydroxy-6-oxononadienedioate/2-hydroxy-6-oxononatrienedioate hydrolase-like	down	up
	LOC100808231	WRKY33-activating protein (SIB)	down	up
	LOC100808168	diacylglycerol O-acyltransferase 2D-like	down	up
	LOC100803163	uncharacterized LOC100803163	down	up
	LOC100803263	ABC transporter A family member 1	down	up
	LOC100500241	small ubiquitin-like modifier	down	up
	LOC100791958	putative Myb family transcription factor At1g14600	down	up
HSK0/HSK48	LOC102660101	phosphoinositide phosphatase SAC1-like	up	down
	LOC100500688	ibosome-binding ATPase YchF	up	down
	LOC100819254	NADPH-dependent thioredoxin reductase 3	up	down
	LOC100818051	uncharacterized LOC100818051	up	down
	LOC100784704	pentatricopeptide repeat-containing protein At5g03800	up	down
	LOC100811995	chaperonin CPN60-2, mitochondria	up	down
	LOC100784356	cell division protein FtsZ homolog 2-1, chloroplastic	up	down
	LOC100805158	transmembrane 9 superfamily member 11	up	down
	LOC100782743	1,4-dihydroxy-2-naphthoyl-CoA synthase, peroxisomal	up	down
	LOC100787350	phosphomethylpyrimidine synthase, chloroplastic	up	down
	LOC100794560	ribosome-recycling factor, chloroplastic-like	up	down
	LOC100792534	protein TSS	up	down
	LOC100809637	uncharacterized LOC100809637	up	down
	LOC100789973	2-phytyl-1,4-beta-naphthoquinone methyltransferase, chloroplastic	up	down
	LOC100778208	long-chain-alcohol oxidase FAO4A	up	down
	LOC100803578	formin-like protein 6	up	down
	LOC100802355	uncharacterized LOC100802355	up	down
	LOC100789448	protein NLRC3	up	down
	LOC100777819	transcription factor bHLH79	up	down
	LOC100790800	E3 ubiquitin-protein ligase RGLG2	up	down
	LOC100787545	DEAD-box ATP-dependent RNA helicase 20	up	down
	LOC100777921	DNA-directed RNA polymerase 2B, chloroplastic/mitochondrial	up	down
	LOC100801687	protein RETICULATA-RELATED 4, chloroplastic	up	down
	LOC100812418	probable methyltransferase PMT13	up	down
	LOC100807370	protein CELLULOSE SYNTHASE INTERACTIVE 1-like	up	down
	LOC100803742	plastoglobulin-1, chloroplastic	up	down
	LOC100794002	protein CELLULOSE SYNTHASE INTERACTIVE 1	up	down
	LOC100803721	guanine nucleotide exchange factor SPIKE 1	up	down
	LOC100780381	ribosomal RNA small subunit methyltransferase, chloroplastic	up	down
	LOC100815287	putative pentatricopeptide repeat-containing protein At1g17630	up	down
	LOC100786770	kinesin-like protein KIN-4A	up	down
	LOC100784915	30S ribosomal protein 1, chloroplastic-like	down	up
	LOC100811955	aconitate hydratase 1	down	up
	LOC100780285	uncharacterized LOC100780285	down	up
	LOC100807954	beta carbonic anhydrase 5, chloroplastic	down	up
	LOC100800977	protein LNK2	down	up
	LOC100807232	uncharacterized LOC100807232	down	up
	LOC100789384	protein SYM1	down	up
	LOC100801442	uncharacterized LOC100801442	down	up
	LOC100778369	mitogen-activated protein kinase 9	down	up
	LOC100804136	L-type lectin-domain containing receptor kinase S.4	down	up
	LOC100792232	DEAD-box ATP-dependent RNA helicase 20-like	down	up
	LOC100798088	serine/threonine-protein kinase D6PKL2	down	up
	LOC102664796	nucleolin 1	down	up
	LOC100777949	vacuolar-sorting receptor 1	down	up
	LOC100792665	cysteine-rich receptor-like protein kinase, CRK40	down	up
	LOC100795799	ethylene receptor	down	up
	LOC100794849	phospholipase D alpha 1	down	up
HRK0/HSK0 and HRK48/HSK48	LOC100305460	isulfide isomerase-like protein	up	down
	LOC100775637	protein kinase superfamily protein	up	down
	LOC100775901	uncharacterized LOC100775901	up	down
	LOC100781312	soluble inorganic pyrophosphatase 3	up	down
	LOC100781536	carotenoid 9,10(9',10')-cleavage dioxygenase 1-like	up	down
	LOC100782096	NADP-dependent malic enzyme	up	down
	LOC100782610	uncharacterized LOC100782610	up	down
	LOC100784994	uncharacterized LOC100784994	up	down
	LOC100791137	probable sugar phosphate/phosphate translocator At3g11320	up	down
	LOC100792174	60S ribosomal protein L3	up	down
	LOC100793677	pyrophosphate-energized vacuolar membrane proton pump-like	up	down
	LOC100795386	uncharacterized LOC100795386	up	down
	LOC100795812	type IV inositol polyphosphate 5-phosphatase 3	up	down
	LOC100796246	putative UDP-glucuronate:xylan alpha-glucuronosyltransferase 3	up	down
	LOC100800798	valine--tRNA ligase, mitochondrial 1-like	up	down
	LOC100801984	uncharacterized LOC100801984	up	down
	LOC100803776	pyrophosphate-energized vacuolar membrane proton pump	up	down
	LOC100804638	protein TRIGALACTOSYLDIACYLGLYCEROL 4, chloroplastic	up	down
	LOC100805392	probable serine/threonine-protein kinase WNK2	up	down
	LOC100806606	disease resistance protein RPM1	up	down
	LOC100810362	L-type lectin-domain containing receptor kinase VIII.2	up	down
	LOC100812339	uncharacterized LOC100812339	up	down
	LOC100816713	uncharacterized LOC100816713	up	down
	LOC100818648	THO complex subunit 7A-like	up	down
	LOC100820469	F-box/LRR-repeat protein 3	up	down
	LOC102659388	leucine aminopeptidase 2, chloroplastic	up	down
	LOC102659651	uncharacterized LOC102659651	up	down
	LOC102660068	uncharacterized LOC102660068	up	down
	LOC102660588	uncharacterized LOC102660588	up	down
	LOC102661666	uncharacterized LOC102661666	up	down
	LOC102662262	uncharacterized LOC102662262	up	down
	LOC102666316	uncharacterized LOC102666316	up	down
	LOC102666513	uncharacterized LOC102666513	up	down
	LOC102668868	uncharacterized LOC102668868	up	down
	LOC102669969	L10-interacting MYB domain-containing protein	up	down
	LOC106794634	uncharacterized LOC106794634	up	down
	LOC106795185	uncharacterized LOC106795185	up	down
	LOC106796317	uncharacterized LOC106796317	up	down
	LOC106796343	heterogeneous nuclear ribonucleoprotein 1	up	down
	LOC106796498	uncharacterized LOC106796498	up	down
	LOC106796758	uncharacterized LOC106796758	up	down
	LOC106799334	uncharacterized LOC106799334	up	down
	LOC100305354	serine/threonine kinase-like protein	down	up
	LOC100775211	protein SICKLE	down	up
	LOC100777175	putative disease resistance protein RGA4	down	up
	LOC100777373	protein SABRE	down	up
	LOC100779117	uncharacterized LOC100779117	down	up
	LOC100779832	uncharacterized LOC100779832	down	up
	LOC100780425	rhodanese-like domain-containing protein 10	down	up
	LOC100781168	uncharacterized LOC100781168	down	up
	LOC100786461	receptor-like protein kinase FERONIA-like	down	up
	LOC100786666	pleiotropic drug resistance protein 2	down	up
	LOC100791230	50S ribosomal protein L25	down	up
	LOC100791780	soyasapogenol B glucuronide galactosyltransferase-like protein	down	up
	LOC100794112	G-type lectin S-receptor-like serine/threonine-protein kinase At4g27290	down	up
	LOC100799531	uncharacterized LOC100799531	down	up
	LOC100799722	uncharacterized LOC100799722	down	up
	LOC100803642	uncharacterized LOC100803642	down	up
	LOC100805579	uncharacterized LOC100805579	down	up
	LOC100806095	methyltransferase-like protein 13	down	up
	LOC100808902	DExH-box ATP-dependent RNA helicase DExH5, mitochondrial	down	up
	LOC100809905	glutamate synthase [NADH], amyloplastic	down	up
	LOC100814197	triacylglycerol lipase 2	down	up
	LOC100815918	uncharacterized LOC100815918	down	up
	LOC100817135	pentatricopeptide repeat-containing protein At2g17670-like	down	up
	LOC100817543	uncharacterized LOC100817543	down	up
	LOC100817699	amino acid permease 4	down	up
	LOC100819089	small nuclear ribonucleoprotein Sm D1-like	down	up
	LOC102661639	uncharacterized LOC102661639	down	up
	LOC102662431	uncharacterized LOC102662431	down	up
	LOC102662612	uncharacterized LOC102662612	down	up
	LOC102663411	uncharacterized LOC102663411	down	up
	LOC102668517	uncharacterized LOC102668517	down	up
	LOC102669552	polyadenylate-binding protein-interacting protein 11	down	up
HRK0/HSK0	LOC100789467	uncharacterized LOC100789467	up	down
	LOC100777401	uncharacterized protein At1g28695	up	down
	LOC100783398	uncharacterized LOC100783398	up	down
	LOC106796805	G-type lectin S-receptor-like serine/threonine-protein kinase At4g27290	up	down
	LOC102663861	uncharacterized LOC102663861	up	down
	LOC102668821	uncharacterized LOC102668821	up	down
	LOC100820426	transcription factor ERF	up	down
	LOC100808537	sugar efflux transporter SWEET28	up	down
	LOC102670483	uncharacterized LOC102670483	up	down
	LOC102669100	Nod-factor receptor 5B, NFR5B	up	down
	LOC100776459	uncharacterized LOC100776459	up	down
	LOC100788736	uncharacterized LOC100788736	up	down
	LOC106797149	uncharacterized LOC106797149	up	down
	LOC100791727	uncharacterized LOC100791727	up	down
	LOC100818329	replication factor C subunit 3-like	up	down
	LOC100818655	tricin synthase 1	up	down
	LOC100788180	lycopene epsilon cyclase, chloroplastic	up	down
	LOC100778712	structural maintenance of chromosomes protein 4	up	down
	LOC100781088	uncharacterized LOC100781088	up	down
	LOC100818310	probable serine/threonine-protein kinase PIX13	up	down
	LOC100806962	transcription factor SPATULA	up	down
	LOC100820627	protein SINE1	up	down
	LOC106798710	uncharacterized LOC106798710	up	down
	LOC100526925	anaphase-promoting complex subunit 10-like	up	down
	LOC106796067	uncharacterized LOC106796067	up	down
	LOC102666353	uncharacterized LOC102666353	up	down
	LOC732569	utative receptor protein kinase PERK1	up	down
	LOC100816378	serine O-acetyltransferase (SAT)	up	down
	LOC100809974	transcription factor BEE 1	up	down
	LOC100784207	cellulose synthase A catalytic subunit 8 [UDP-forming]	up	down
	LOC100808098	protein MALE DISCOVERER 2	up	down
	LOC100786553	probable methyltransferase PMT11	up	down
	LOC100796456	subtilisin-like protease SBT2.2	up	down
	LOC100814936	uncharacterized LOC100814936	up	down
	LOC100775410	anaphase-promoting complex subunit 5	up	down
	LOC100790112	UTP-glucose-1-phosphate uridylyltransferase	up	down
	LOC100779834	cellulose synthase A catalytic subunit 7 [UDP-forming]	up	down
	LOC100807032	uroporphyrinogen decarboxylase 1, chloroplastic	up	down
	LOC100800339	phytochrome E-like,PHYE2	up	down
	LOC100819817	transcription factor E2FB	up	down
	LOC102669842	translation initiation factor eIF-2B subunit alpha	up	down
	LOC100780280	intracellular protein transport protein USO1-like	up	down
	LOC100804439	protein PIN-LIKES 3	up	down
	LOC100037472	protein disulfide isomerase-like protein, PDIS-2	up	down
	LOC102661320	uncharacterized LOC102661320	up	down
	LOC102661030	DNA mismatch repair protein MSH1, mitochondrial	up	down
	LOC102661511	uncharacterized LOC102661511	up	down
	LOC100306426	UPF0057 membrane protein At4g30660	down	up
	LOC100500407	uncharacterized LOC100500407	down	up
	LOC100779369	hypersensitive-induced response protein 2-like, HIR1	down	up
	LOC100785379	ATP-dependent Clp protease adapter protein CLPS1, chloroplastic	down	up
	LOC100796280	fanconi-associated nuclease 1 homolog	down	up
	LOC100796320	receptor-like protein kinase FERONIA	down	up
	LOC100803635	putative inactive kinesin-like protein KIN-7B	down	up
	LOC100808663	acyl-coenzyme A thioesterase 13	down	up
	LOC100811347	uncharacterized LOC100811347	down	up
	LOC100815441	naringenin,2-oxoglutarate 3-dioxygenase	down	up
	LOC100817058	uncharacterized LOC100817058	down	up
	LOC100818789	6-phosphogluconate dehydrogenase, decarboxylating 2, chloroplastic	down	up
	LOC100820456	mitochondrial uncoupling protein 1	down	up
	LOC102659832	putative pentatricopeptide repeat-containing protein At1g19290	down	up
	LOC102659881	uncharacterized LOC102659881	down	up
	LOC102662065	uncharacterized LOC102662065	down	up
	LOC102664426	uncharacterized LOC102664426	down	up
	LOC106795743	uncharacterized LOC106795743	down	up
	LOC106799180	uncharacterized LOC106799180	down	up
HRK48/HSK48	LOC100775750	GATA transcription factor 26	up	down
	LOC100777626	amino acid permease 4	up	down
	LOC100778395	chloride channel protein CLC-b	up	down
	LOC100781002	probable ADP-ribosylation factor GTPase-activating protein AGD14	up	down
	LOC100784920	probable LRR receptor-like serine/threonine-protein kinase At1g53430	up	down
	LOC100785688	beta-galactosidase 1	up	down
	LOC100786470	cystathionine beta-lyase, chloroplastic-like	up	down
	LOC100789457	pentatricopeptide repeat-containing protein At2g13600	up	down
	LOC100798263	uncharacterized LOC100798263	up	down
	LOC100809061	uncharacterized LOC100809061	up	down
	LOC100811727	cytochrome P450 81E8	up	down
	LOC100816905	plasma membrane ATPase 4	up	down
	LOC100820155	2,3-bisphosphoglycerate-independent phosphoglycerate mutase	up	down
	LOC102670457	L10-interacting MYB domain-containing protein-like	up	down
	LOC547638	resistance protein KR3 isoform X1	down	up
	LOC100499653	TIR-NBS-LRR type disease resistance protein	down	up
	LOC100527224	uncharacterized LOC100527224	down	up
	LOC100527327	uncharacterized LOC100527327	down	up
	LOC100775428	cysteine-rich receptor-like protein kinase,CRK62	down	up
	LOC100777764	ELMO domain-containing protein A	down	up
	LOC100786866	F-box/LRR-repeat protein At5g63520	down	up
	LOC100790649	telomerase reverse transcriptase	down	up
	LOC100798479	pentatricopeptide repeat-containing protein At3g53700, chloroplastic-like	down	up
	LOC100803056	actin-related protein 7	down	up
	LOC100805327	receptor-like protein 6	down	up
	LOC100806027	mps one binder kinase activator-like 1-like	down	up
	LOC100813574	chromodomain-helicase-DNA-binding protein 8	down	up
	LOC100815190	ALBINO3-like protein 1, chloroplastic	down	up
	LOC100816365	beta-amylase 8	down	up
	LOC100816616	UDP-sulfoquinovose synthase, chloroplastic	down	up
	LOC100820033	LRR domain-containing protein	down	up
	LOC100820220	WD repeat-containing protein 55	down	up
	LOC102659486	uncharacterized LOC102659486	down	up
	LOC102664345	receptor-like protein 46	down	up
	LOC102665424	homeobox-DDT domain protein RLT1-like	down	up
	LOC102665668	uncharacterized LOC102665668	down	up
	LOC102665937	uncharacterized LOC102665937	down	up
	LOC102666012	uncharacterized LOC102666012	down	up
	LOC102666829	receptor-like protein 50	down	up
	LOC102669418	uncharacterized LOC102669418	down	up
	LOC102669438	exocyst complex component EXO70B1	down	up
Note: E is the expression level of gene, M is the expression level of methylation.
