# Supplementary material for: Methylome and Transcriptome Analyses of Soybean Response to Bean Pyralid Larvae
Source: Research Square preprint supplement (doi:10.21203/rs.3.rs-695343/v1), 2021-07-27
Supplement: Supplementary file 3 [file 7688b2c5f365cdb4b008e224.xlsx]

## Sheet: Sheet1
Table S2 Pathway analysis of the negatively correlated genes
Sample	Term	ID	p-Value
HRK0/HRK48	RNA transport	gmx03013	0.0146084
	Ascorbate and aldarate metabolism	gmx00053	0.0430029
	Fatty acid biosynthesis	gmx00061	0.0435723
	Porphyrin and chlorophyll metabolism	gmx00860	0.0458469
	Fatty acid degradation	gmx00071	0.0526413
	Homologous recombination	gmx03440	0.0537695
	Fatty acid metabolism	gmx01212	0.075525
	Peroxisome	gmx04146	0.0821269
	Glutathione metabolism	gmx00480	0.088686
	Metabolic pathways	gmx01100	0.617719
	Biosynthesis of secondary metabolites	gmx01110	0.66012
HSK0/HSK48	Ubiquinone and other terpenoid-quinone biosynthesis	gmx00130	0.000852325
	Sulfur relay system	gmx04122	0.0109382
	Thiamine metabolism	gmx00730	0.0166846
	Selenocompound metabolism	gmx00450	0.0204984
	Ether lipid metabolism	gmx00565	0.0380986
	Nitrogen metabolism	gmx00910	0.0529535
	2-Oxocarboxylic acid metabolism	gmx01210	0.0804278
	Citrate cycle (TCA cycle)	gmx00020	0.0804278
	Glyoxylate and dicarboxylate metabolism	gmx00630	0.0867829
	RNA degradation	gmx03018	0.109807
	Peroxisome	gmx04146	0.117178
	Pyrimidine metabolism	gmx00240	0.131645
	Glycerophospholipid metabolism	gmx00564	0.136912
	Endocytosis	gmx04144	0.201377
	Spliceosome	gmx03040	0.234243
	Plant-pathogen interaction	gmx04626	0.25479
	Biosynthesis of secondary metabolites	gmx01110	0.310865
	Biosynthesis of amino acids	gmx01230	0.315189
	Carbon metabolism	gmx01200	0.323604
	Metabolic pathways	gmx01100	0.373078
	Plant hormone signal transduction	gmx04075	0.407354
	Biosynthesis of secondary metabolites	gmx01110	0.791844
	Metabolic pathways	gmx01100	0.81347
HRK0/HSK0	Pyruvate metabolism	gmx00620	0.0151174
	Propanoate metabolism	gmx00640	0.0226995
	Glyoxylate and dicarboxylate metabolism	gmx00630	0.031803
	Carbon metabolism	gmx01200	0.0365487
	Lipoic acid metabolism	gmx00785	0.0425176
	Carotenoid biosynthesis	gmx00906	0.0445012
	Peroxisome	gmx04146	0.0559454
	Protein processing in endoplasmic reticulum	gmx04141	0.0629561
	Arginine and proline metabolism	gmx00330	0.0701641
	Selenocompound metabolism	gmx00450	0.0810167
	Sulfur relay system	gmx04122	0.0882134
	One carbon pool by folate	gmx00670	0.0906803
	Sesquiterpenoid and triterpenoid biosynthesis	gmx00909	0.11266
	Galactose metabolism	gmx00052	0.119718
	Biosynthesis of unsaturated fatty acids	gmx01040	0.139804
	Steroid biosynthesis	gmx00100	0.139804
	Endocytosis	gmx04144	0.149675
	Glycolysis / Gluconeogenesis	gmx00010	0.151424
	Nitrogen metabolism	gmx00910	0.153355
	Nicotinate and nicotinamide metabolism	gmx00760	0.159623
	Ascorbate and aldarate metabolism	gmx00053	0.177658
	Photosynthesis - antenna proteins	gmx00196	0.177711
	Purine metabolism	gmx00230	0.193972
	Spliceosome	gmx03040	0.194648
	Biosynthesis of amino acids	gmx01230	0.212348
	Fatty acid degradation	gmx00071	0.213879
	Alanine, aspartate and glutamate metabolism	gmx00250	0.218036
	alpha-Linolenic acid metabolism	gmx00592	0.226285
	ABC transporters	gmx02010	0.233877
	Pentose and glucuronate interconversions	gmx00040	0.244843
	DNA replication	gmx03030	0.246539
	Fructose and mannose metabolism	gmx00051	0.248535
	Pentose phosphate pathway	gmx00030	0.248535
	Lysine degradation	gmx00310	0.254453
	Sulfur metabolism	gmx00920	0.286242
	Aminoacyl-tRNA biosynthesis	gmx00970	0.294927
	Fatty acid metabolism	gmx01212	0.294927
	mRNA surveillance pathway	gmx03015	0.332853
	Fatty acid biosynthesis	gmx00061	0.335061
	Glutathione metabolism	gmx00480	0.338509
	Porphyrin and chlorophyll metabolism	gmx00860	0.349406
	Valine, leucine and isoleucine degradation	gmx00280	0.363445
	Mismatch repair	gmx03430	0.370351
	RNA degradation	gmx03018	0.377794
	Oxidative phosphorylation	gmx00190	0.383681
	Protein export	gmx03060	0.387294
	Homologous recombination	gmx03440	0.397243
	beta-Alanine metabolism	gmx00410	0.410259
	Circadian rhythm - plant	gmx04712	0.410259
	Pyrimidine metabolism	gmx00240	0.437749
	Ribosome	gmx03010	0.456286
	Glycerolipid metabolism	gmx00561	0.47128
	Amino sugar and nucleotide sugar metabolism	gmx00520	0.474066
	Biosynthesis of secondary metabolites	gmx01110	0.488246
	Glycine, serine and threonine metabolism	gmx00260	0.488336
	Nucleotide excision repair	gmx03420	0.499403
	Carbon fixation in photosynthetic organisms	gmx00710	0.51556
	Metabolic pathways	gmx01100	0.567085
	Glycerophospholipid metabolism	gmx00564	0.604385
	Cysteine and methionine metabolism	gmx00270	0.610837
	Starch and sucrose metabolism	gmx00500	0.635538
	Ubiquitin mediated proteolysis	gmx04120	0.707462
	RNA transport	gmx03013	0.772887
	Plant hormone signal transduction	gmx04075	0.798249
	Plant-pathogen interaction	gmx04626	0.843102
HRK48/HSK48	Carbon metabolism	gmx01200	0.0148106
	Propanoate metabolism	gmx00640	0.0153735
	Lipoic acid metabolism	gmx00785	0.0346771
	Pyruvate metabolism	gmx00620	0.0414685
	Biosynthesis of amino acids	gmx01230	0.0439252
	Arginine and proline metabolism	gmx00330	0.0512382
	Selenocompound metabolism	gmx00450	0.0682668
	Sesquiterpenoid and triterpenoid biosynthesis	gmx00909	0.0925268
	Oxidative phosphorylation	gmx00190	0.0944914
	Glycolysis / Gluconeogenesis	gmx00010	0.0962385
	Amino sugar and nucleotide sugar metabolism	gmx00520	0.100147
	Glycine, serine and threonine metabolism	gmx00260	0.10357
	Endocytosis	gmx04144	0.11208
	Biosynthesis of unsaturated fatty acids	gmx01040	0.118416
	Steroid biosynthesis	gmx00100	0.118416
	Nitrogen metabolism	gmx00910	0.130054
	Nicotinate and nicotinamide metabolism	gmx00760	0.131738
	Photosynthesis - antenna proteins	gmx00196	0.146949
	Spliceosome	gmx03040	0.147559
	Ascorbate and aldarate metabolism	gmx00053	0.151003
	Protein export	gmx03060	0.180598
	Fatty acid degradation	gmx00071	0.182413
	Alanine, aspartate and glutamate metabolism	gmx00250	0.186033
	alpha-Linolenic acid metabolism	gmx00592	0.193227
	ABC transporters	gmx02010	0.194592
	Glyoxylate and dicarboxylate metabolism	gmx00630	0.207427
	DNA replication	gmx03030	0.210939
	Lysine degradation	gmx00310	0.212207
	Glycerolipid metabolism	gmx00561	0.228272
	Carotenoid biosynthesis	gmx00906	0.236231
	mRNA surveillance pathway	gmx03015	0.250813
	Aminoacyl-tRNA biosynthesis	gmx00970	0.253577
	Fatty acid metabolism	gmx01212	0.253577
	Peroxisome	gmx04146	0.273236
	Fatty acid biosynthesis	gmx00061	0.282129
	Valine, leucine and isoleucine degradation	gmx00280	0.307122
	RNA degradation	gmx03018	0.327735
	Homologous recombination	gmx03440	0.337157
	2-Oxocarboxylic acid metabolism	gmx01210	0.348808
	beta-Alanine metabolism	gmx00410	0.348808
	Circadian rhythm - plant	gmx04712	0.348808
	Citrate cycle (TCA cycle)	gmx00020	0.348808
	Ribosome	gmx03010	0.369021
	Fructose and mannose metabolism	gmx00051	0.379814
	Pentose phosphate pathway	gmx00030	0.379814
	Plant hormone signal transduction	gmx04075	0.381767
	Pyrimidine metabolism	gmx00240	0.382392
	Galactose metabolism	gmx00052	0.38256
	Carbon fixation in photosynthetic organisms	gmx00710	0.444964
	Purine metabolism	gmx00230	0.46119
	Glutathione metabolism	gmx00480	0.498905
	Protein processing in endoplasmic reticulum	gmx04141	0.516022
	Cysteine and methionine metabolism	gmx00270	0.535415
	Pentose and glucuronate interconversions	gmx00040	0.537479
	Metabolic pathways	gmx01100	0.637694
	Biosynthesis of secondary metabolites	gmx01110	0.654366
	Plant-pathogen interaction	gmx04626	0.777874
	Starch and sucrose metabolism	gmx00500	0.828122
