# Supplementary material for: Methylome and Transcriptome Analyses of Soybean Response to Bean Pyralid Larvae
Source: Research Square preprint supplement (doi:10.21203/rs.3.rs-695343/v1), 2021-07-27
Supplement: Supplementary file 4 [file dc50c5900044d5ed6e9b57c6.xlsx]

## Sheet: Sheet1
Table S3 Pathway analysis of the negatively correlated genes in the promoter regions
Sample	Term	ID	P-Value
HRK0/HRK48	Purine metabolism	gmx00230	0.0727087
	Phenylpropanoid biosynthesis	gmx00940	0.0795385
	Metabolic pathways	gmx01100	0.223952
	Biosynthesis of secondary metabolites	gmx01110	0.387748
HSK0/HSK48	Monoterpenoid biosynthesis	gmx00902	0.007734
	SNARE interactions in vesicular transport	gmx04130	0.00892805
	Pentose phosphate pathway	gmx00030	0.0511816
	Carbon fixation in photosynthetic organisms	gmx00710	0.0626919
	Plant hormone signal transduction	gmx04075	0.0633258
	RNA degradation	gmx03018	0.083547
	Biosynthesis of amino acids	gmx01230	0.191852
	Carbon metabolism	gmx01200	0.197454
	Biosynthesis of secondary metabolites	gmx01110	0.202881
	Metabolic pathways	gmx01100	0.833773
HRK0/HSK0	Endocytosis	gmx04144	0.000387474
	Glycolysis / Gluconeogenesis	gmx00010	0.00951146
	Pyruvate metabolism	gmx00620	0.0203038
	RNA degradation	gmx03018	0.0242065
	Sesquiterpenoid and triterpenoid biosynthesis	gmx00909	0.0292113
	Fructose and mannose metabolism	gmx00051	0.051196
	Pentose phosphate pathway	gmx00030	0.051196
	Ether lipid metabolism	gmx00565	0.0588738
	Carbon metabolism	gmx01200	0.063305
	ABC transporters	gmx02010	0.0639429
	Spliceosome	gmx03040	0.0640218
	Glycine, serine and threonine metabolism	gmx00260	0.0642801
	Steroid biosynthesis	gmx00100	0.0740025
	Carotenoid biosynthesis	gmx00906	0.0789933
	Propanoate metabolism	gmx00640	0.130901
	DNA replication	gmx03030	0.134563
	Lysine degradation	gmx00310	0.165099
	mRNA surveillance pathway	gmx03015	0.165395
	Biosynthesis of amino acids	gmx01230	0.177439
	Oxidative phosphorylation	gmx00190	0.196454
	Glycerophospholipid metabolism	gmx00564	0.20547
	Fatty acid biosynthesis	gmx00061	0.221787
	Purine metabolism	gmx00230	0.238034
	Valine, leucine and isoleucine degradation	gmx00280	0.242372
	Pyrimidine metabolism	gmx00240	0.254701
	Protein export	gmx03060	0.259943
	Citrate cycle (TCA cycle)	gmx00020	0.277114
	Galactose metabolism	gmx00052	0.305641
	Photosynthesis	gmx00195	0.335296
	Aminoacyl-tRNA biosynthesis	gmx00970	0.357257
	Fatty acid metabolism	gmx01212	0.357257
	Carbon fixation in photosynthetic organisms	gmx00710	0.359413
	Starch and sucrose metabolism	gmx00500	0.381329
	Peroxisome	gmx04146	0.382669
	Glutathione metabolism	gmx00480	0.407092
	Protein processing in endoplasmic reticulum	gmx04141	0.411886
	Phagosome	gmx04145	0.413047
	Pentose and glucuronate interconversions	gmx00040	0.441954
	Ribosome	gmx03010	0.548409
	Plant hormone signal transduction	gmx04075	0.558347
	Metabolic pathways	gmx01100	0.579009
	Biosynthesis of secondary metabolites	gmx01110	0.692095
HRK48/HSK48	Endocytosis	gmx04144	0.000793459
	Monoterpenoid biosynthesis	gmx00902	0.0255339
	Sesquiterpenoid and triterpenoid biosynthesis	gmx00909	0.0349457
	Photosynthesis - antenna proteins	gmx00196	0.056566
	mRNA surveillance pathway	gmx03015	0.0670392
	Ether lipid metabolism	gmx00565	0.0702168
	ABC transporters	gmx02010	0.0762223
	Propanoate metabolism	gmx00640	0.0782862
	Oxidative phosphorylation	gmx00190	0.081392
	Spliceosome	gmx03040	0.0879732
	Steroid biosynthesis	gmx00100	0.0881211
	Carotenoid biosynthesis	gmx00906	0.0940147
	Lysine degradation	gmx00310	0.0995368
	Fatty acid biosynthesis	gmx00061	0.135585
	DNA replication	gmx03030	0.1592
	Protein export	gmx03060	0.16047
	Circadian rhythm - plant	gmx04712	0.171844
	Starch and sucrose metabolism	gmx00500	0.178403
	Fructose and mannose metabolism	gmx00051	0.189414
	Pentose phosphate pathway	gmx00030	0.189414
	Galactose metabolism	gmx00052	0.190994
	Glycine, serine and threonine metabolism	gmx00260	0.212791
	Aminoacyl-tRNA biosynthesis	gmx00970	0.226501
	Fatty acid metabolism	gmx01212	0.226501
	Glycerophospholipid metabolism	gmx00564	0.241163
	Peroxisome	gmx04146	0.244421
	Plant hormone signal transduction	gmx04075	0.251309
	RNA degradation	gmx03018	0.252222
	Glutathione metabolism	gmx00480	0.261937
	Pyruvate metabolism	gmx00620	0.284678
	Pentose and glucuronate interconversions	gmx00040	0.287472
	Pyrimidine metabolism	gmx00240	0.297223
	Purine metabolism	gmx00230	0.364039
	Glycolysis / Gluconeogenesis	gmx00010	0.381294
	Protein processing in endoplasmic reticulum	gmx04141	0.471078
	Biosynthesis of secondary metabolites	gmx01110	0.54081
	Biosynthesis of amino acids	gmx01230	0.573189
	Carbon metabolism	gmx01200	0.584892
	Ribosome	gmx03010	0.614742
	Metabolic pathways	gmx01100	0.654108
